# Supplementary material for: Selective elimination of senescent cells by mitochondrial targeting is regulated by ANT2
Source: PubMed Central journal article supplement (PMC6329828; doi:10.1038/s41418-018-0118-3), 2018-05-21

**A**

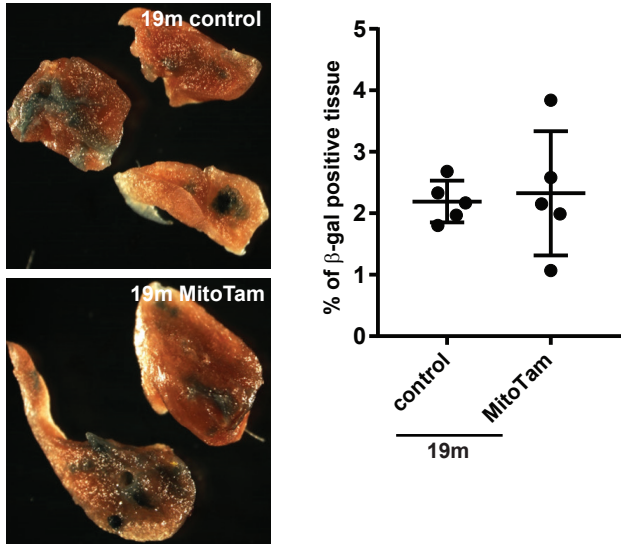

**B**

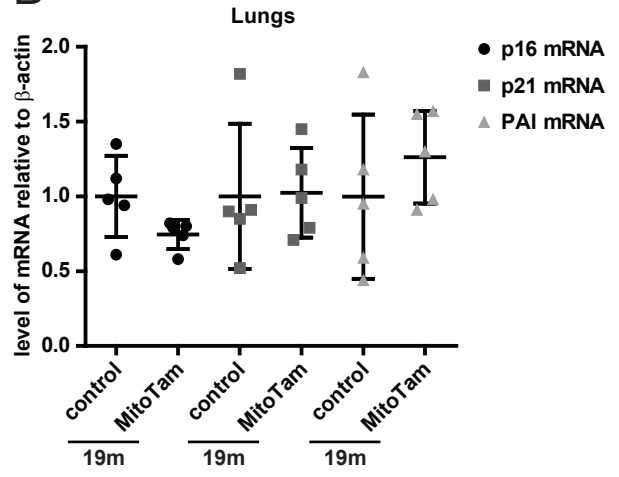

**C**

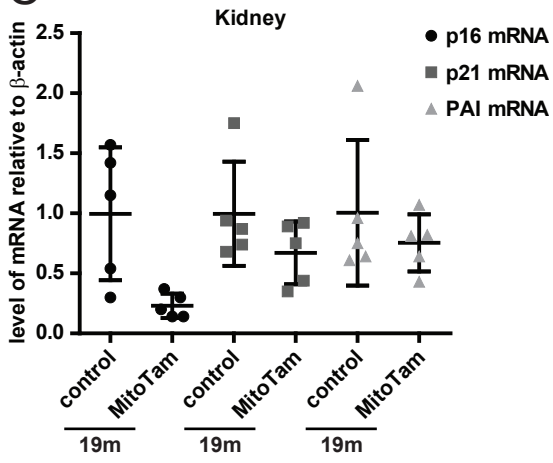

**D**

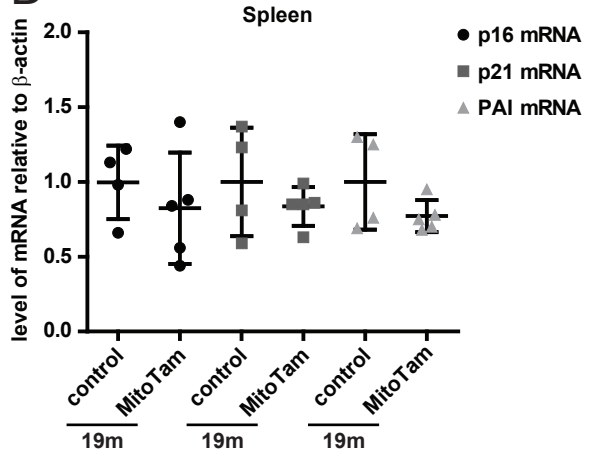

Supplement: 41418_2018_118_MOESM3_ESM.pdf [file 41418_2018_118_MOESM3_ESM.pdf]
